# Supplementary material for: Effects of the properties of short peptides conjugated with cell-penetrating peptides on their internalization into cells
Source: PubMed Central journal article supplement (PMC4530456; doi:10.1038/srep12884), 2015-08-10
Supplement: srep12884-s1.pdf [file srep12884-s1.pdf]

## Supporting Information

### Effects of the properties of short peptides conjugated with cell-penetrating peptides on their internalization into cells

Ryo Matsumoto<sup>1</sup>, Mina Okochi<sup>2</sup>, Kazunori Shimizu<sup>1</sup>, Kei Kanie<sup>1,3</sup>, Ryuji Kato<sup>1,3</sup>, Hiroyuki Honda<sup>1,\*</sup>

<sup>1</sup>Department of Biotechnology, Graduate School of Engineering, Nagoya University, Furo-cho, Chikusa-ku, Nagoya 464-8603, Japan

<sup>2</sup>Department of Chemical Engineering, Graduate School of Science and Engineering, Tokyo Institute of Technology, Ookayama, Meguro-ku, Tokyo, 152-8550, Japan

<sup>3</sup>Department of Basic Medicinal Sciences, Graduate School of Pharmaceutical Sciences, Nagoya University, Furo-cho, Chikusa-ku, Nagoya, Aichi 464-8601, Japan

#### Table of Contents

Figure S1 Detection of Fluorescein-GABA-RRRRRRRR by MALDI-TOF-MS

Figure S2 Relationship between uptake and tripeptide-conjugated R8 concentration

Figure S3 Relationship between uptake and pentapeptide-conjugated R8 concentration

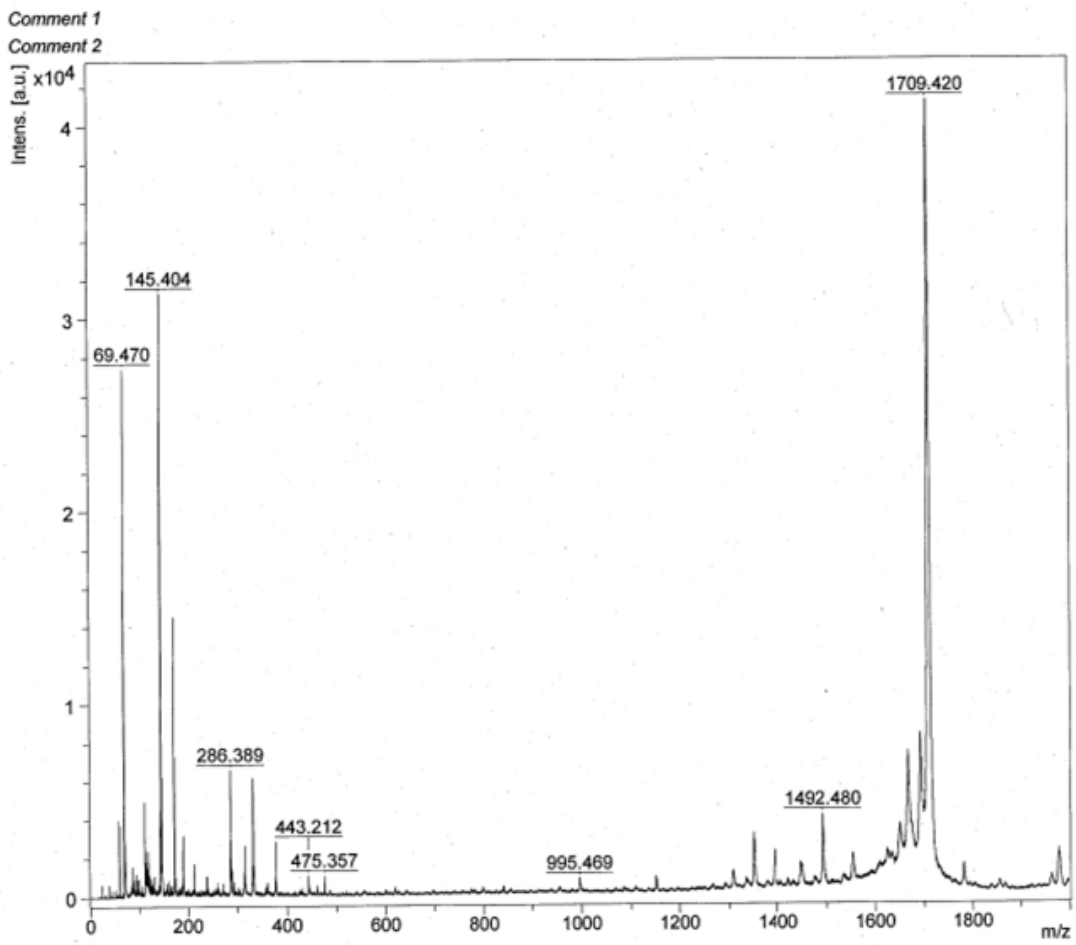

**Fig. S1.** Detection of Fluorescein-GABA-RRRRRRR by MALDI-TOF-MS  
Fluorescein-GABA-RRRRRRR MW; 1709.98. This figure indicates that the synthesis of  
Fluorescein-GABA-RRRRRRR progressed correctly.

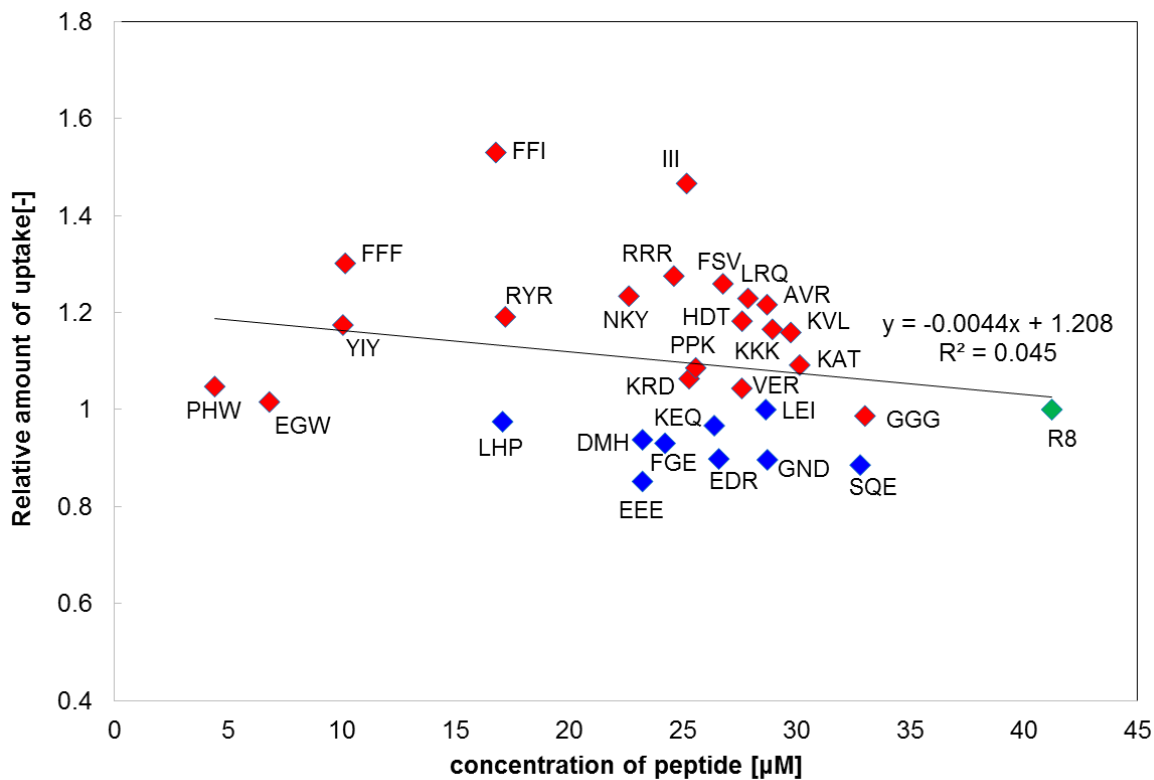

**Fig. S2.** Relationship between uptake and tripeptide-conjugated R8 concentration  
 Peptide concentration was determined using a microplate fluorometer, based on the standard curve of Fluorescein-GABA-RRRRRRRR. The relative amount of uptake was determined by the following equation: (the score of uptake amount of each tripeptide-conjugated R8) / (the score of uptake amount of R8). The color scheme is based on Fig. 4. RLC- or HCV-conjugated R8 was eliminated from this figure because they did not dissolve in the medium because of the self-quenching of fluorescence.

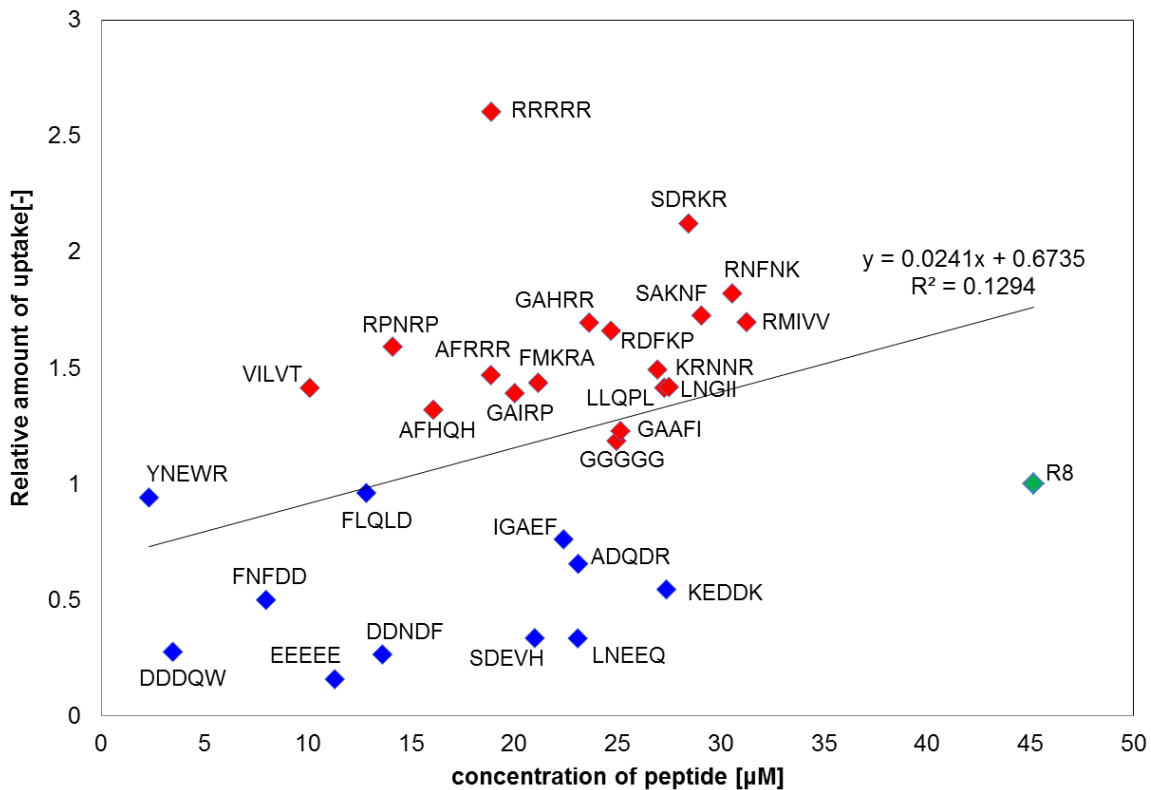

**Fig. S3.** Relationship between uptake and pentapeptide-conjugated R8 concentration. Peptide concentration was determined using a microplate fluorometer, based on the standard curve of Fluorescein-GABA-RRRRRRRR. The relative amount of uptake was determined by the following equation: (the score of uptake amount of each pentapeptide-conjugated R8) / (the score of uptake amount of R8). The color scheme is based on Fig. 5. FFFFF- or IIIII-conjugated R8 was eliminated from this figure because they failed to dissolve in the medium.
